# Supplementary material for: Oxygen vacancies boosted the electrochemical kinetics of Nb2O5−x for superior lithium storage
Source: Royal Society of Chemistry journal article supplement (doi:10.1039/d1cc02299g), 2021-01-01
Supplement: d1cc02299g1.pdf [file d1cc02299g1.pdf]

## *Electronic Supplementary Information for*

Oxygen vacancies boosted the electrochemical kinetics of Nb<sub>2</sub>O<sub>5-x</sub>  
for superior lithium storage

Sheng Li,<sup>#a</sup> Yingxue Cui,<sup>#a</sup> Rong Kang,<sup>a</sup> Bobo Zou,<sup>a</sup> Dickon H. L. Ng,<sup>b</sup> Sherif A. El-Khodary,<sup>a</sup> Xianhu Liu,<sup>c</sup> Jingxia Qiu,<sup>a</sup> Jiabiao Lian,<sup>\*a</sup> and Huaming Li<sup>a</sup>

<sup>a</sup> Key Laboratory of Zhenjiang, Institute for Energy Research, Jiangsu University, Zhenjiang, 212013, China.

<sup>b</sup> Department of Physics, The Chinese University of Hong Kong, Shatin, Hong Kong, China.

<sup>c</sup> Key Laboratory of Materials Processing & Mold (Zhengzhou University), Ministry of Education, Zhengzhou University, Zhengzhou, 450002, China.

<sup>#</sup>S. Li and Y. X. Cui contributed equally to this work.

<sup>\*</sup> Corresponding Author E-mail: jblian@ujs.edu.cn

## **1. Experimental section**

### ***1.1. Preparation of Nb<sub>2</sub>O<sub>5-x</sub> microflowers***

All chemicals were analytical reagents and can be used directly without purification. Firstly, 7.5 mmol of niobium oxalate (C<sub>10</sub>H<sub>5</sub>NbO<sub>20</sub>) and 1.5 mmol of ammonium carbonate ((NH<sub>4</sub>)<sub>2</sub>CO<sub>3</sub>) were added to 30 mL of deionized water under sonicating for 30 minutes. Then, the mixed suspension was transferred to a 50 mL of Teflon-lined stainless steel autoclave and kept at 200 °C for 12 hours. After the reaction, the product was collected, washed with deionized water and ethanol, and dried in an oven at 60 °C for 12 hours. Finally, the product was calcined at 450 °C for 30 minutes with a heating rate of 2 °C min<sup>-1</sup> in Ar/H<sub>2</sub> (95%/5%) to acquire the Nb<sub>2</sub>O<sub>5-x</sub> microflowers.

### ***1.2. Characterization***

The composition and phase information of the samples were measured by a powder X-ray diffractometer (XRD, German Bruker D8 diffractometer with Cu radiation). The morphology and microstructure of the samples were tested by the scanning electron microscope (FE-SEM, JEOL, JSM-7800F) and the high-resolution transmission electron microscope (HRTEM, JEOL, JEM-2100F). The surface elemental composition and chemical states of the samples were performed by X-ray photoelectron spectroscopy (XPS, Thermo Scientific ESCALAB 250Xi system with a monochromated Al K $\alpha$  X-ray source 1486.6 eV). The Raman spectra were obtained on a DXR Raman spectrometer (Thermo Scientific) with a 532 nm laser for illumination. The electron spin resonance (EPR) was performed by using a BRUKER A300-10/12 instrument. The

thermogravimetric analysis (TGA) was characterized on a (Netzsch STA 449 F3, USA) instrument. Nitrogen adsorption–desorption isotherms were measured on a Beishide 3H-2000PS2 type specific surface area and pore size analyzer at 77 K. The Brunauer–Emmett–Teller (BET) specific surface areas ( $S_{\text{BET}}$ ) were calculated using the BET equation, and the pore size distributions were determined using the Barret–Joyner–Halender (BJH) method.

### **1.3. Electrochemical measurements**

The  $\text{Nb}_2\text{O}_{5-x}$  microflowers (80 wt.%), super conductive carbon black (SCCB, Ketjenblack EC-600JD, Lion Corporation) (10 wt.%), and polyvinylidene fluoride (PVDF) (10 wt.%) were mixed in N-methyl-2-pyrrolidone (NMP) and then coated the slurry onto the copper foil. The loading mass was in the range of 0.9 to 1.2  $\text{mg cm}^{-2}$ . Using CR2032-type coin cells assembled in an Ar-filled glove box (oxygen/moisture concentrations < 0.01 ppm) carried out the electrochemical test. The celgard 2400 porous polypropylene membrane was used as the separator. The lithium foil was used as the counter electrode. The lithium-ion electrolyte was 1 M  $\text{LiPF}_6$  EC/DMC/DC solution. Cyclic voltammetry (CV) and electrochemical impedance spectroscopy (EIS) measurements were performed on a Gamry (Interface 1000E Potentiostat) electrochemical workstation. The galvanostatic discharge and charge and galvanostatic intermittent titration technique (GITT) tests were tested with the NEWARE-CT-4008 battery tester between 0.01 V and 3.0 V.

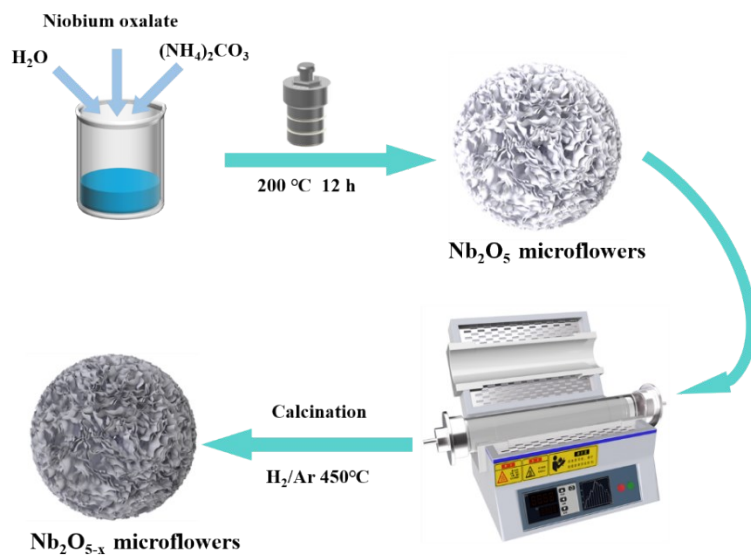

**Fig. S1** Illustration of the preparation process of the  $\text{Nb}_2\text{O}_{5-x}$  microflowers.

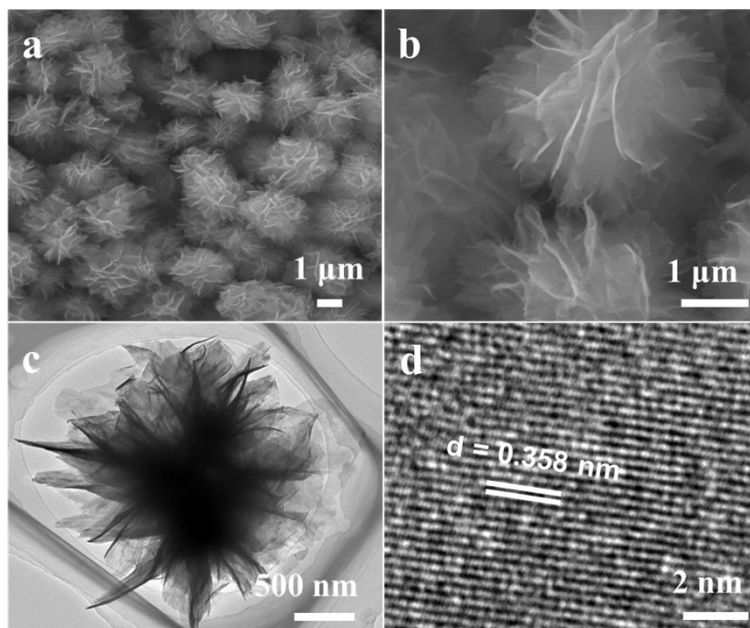

**Fig. S2** (a, b) SEM, (c) TEM, and (d) HRTEM images of the  $\text{Nb}_2\text{O}_5$  microflowers.

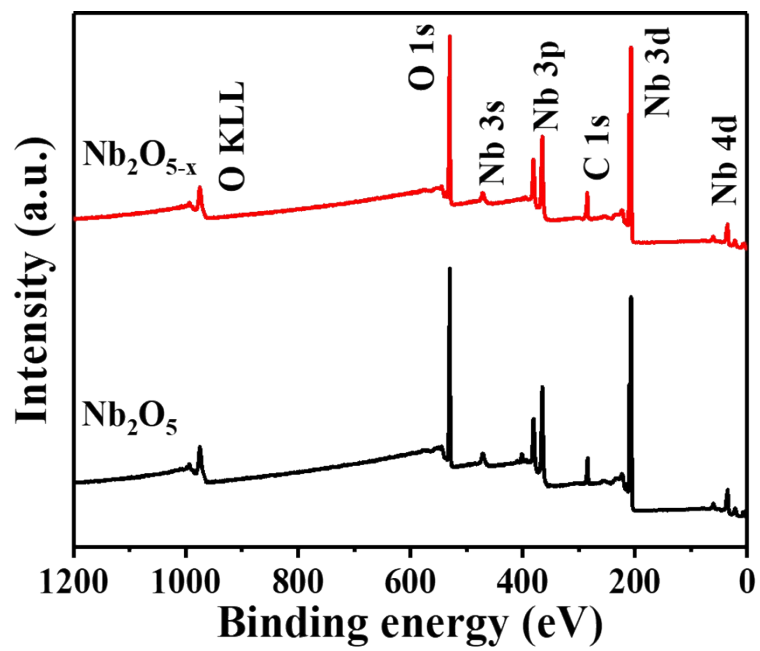

Fig. S3 XPS survey spectra of the  $\text{Nb}_2\text{O}_5$  and  $\text{Nb}_2\text{O}_{5-x}$ .

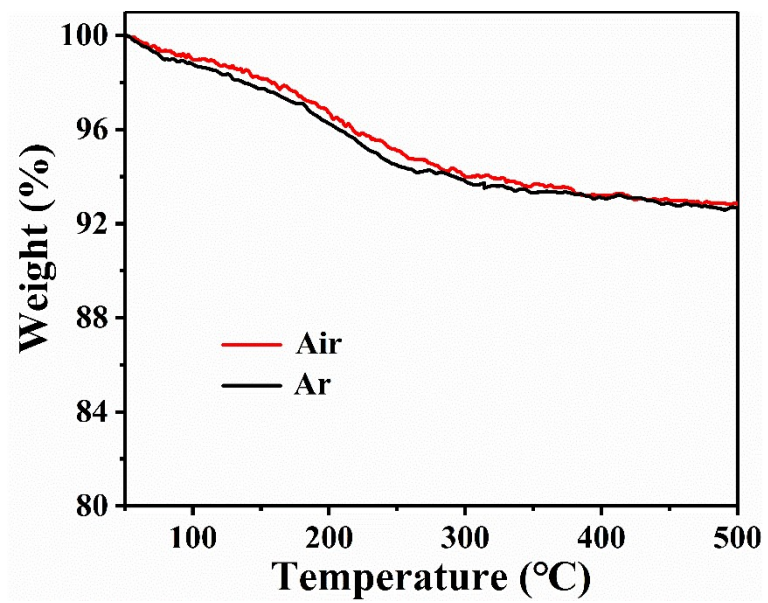

**Fig. S4** TGA curves of the Nb<sub>2</sub>O<sub>5</sub> sample tested in air and argon, respectively.

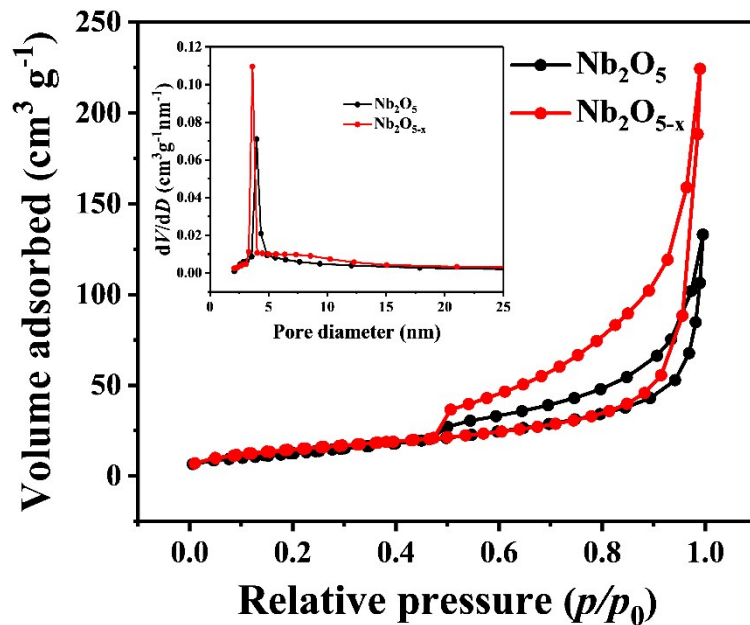

**Fig. S5**  $N_2$  adsorption-desorption isotherms and pore size distribution plots (inset) of the  $Nb_2O_5$  and  $Nb_2O_{5-x}$  samples.

**Table S1** BET specific surface area, BJH pore size, and pore volume of the  $Nb_2O_5$  and  $Nb_2O_{5-x}$ .

| Samples       | BET surface area ( $m^2 g^{-1}$ ) | BJH pore size (nm) | Pore volume ( $cm^3 g^{-1}$ ) |
|---------------|-----------------------------------|--------------------|-------------------------------|
| $Nb_2O_5$     | 48.61                             | 3.81               | 0.23                          |
| $Nb_2O_{5-x}$ | 53.74                             | 3.62               | 0.35                          |



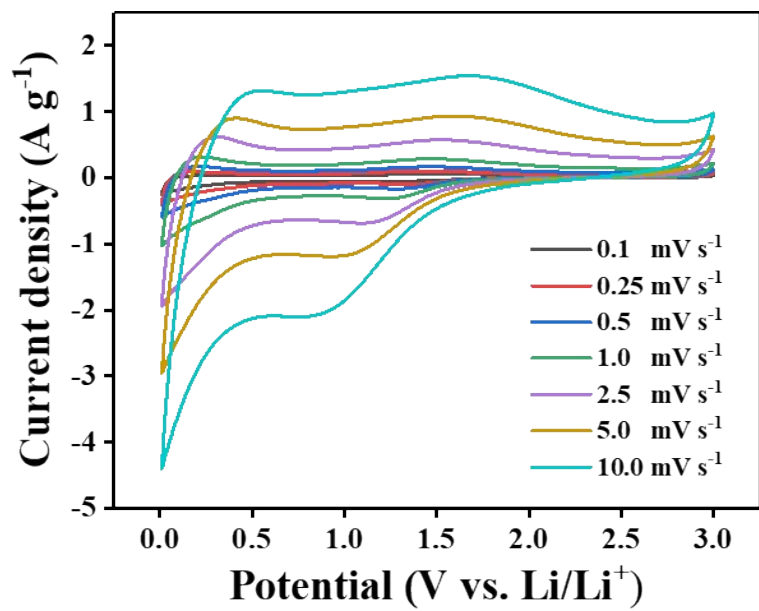

**Fig. S6** CV curves of the  $\text{Nb}_2\text{O}_5$  electrode at different scan rates.

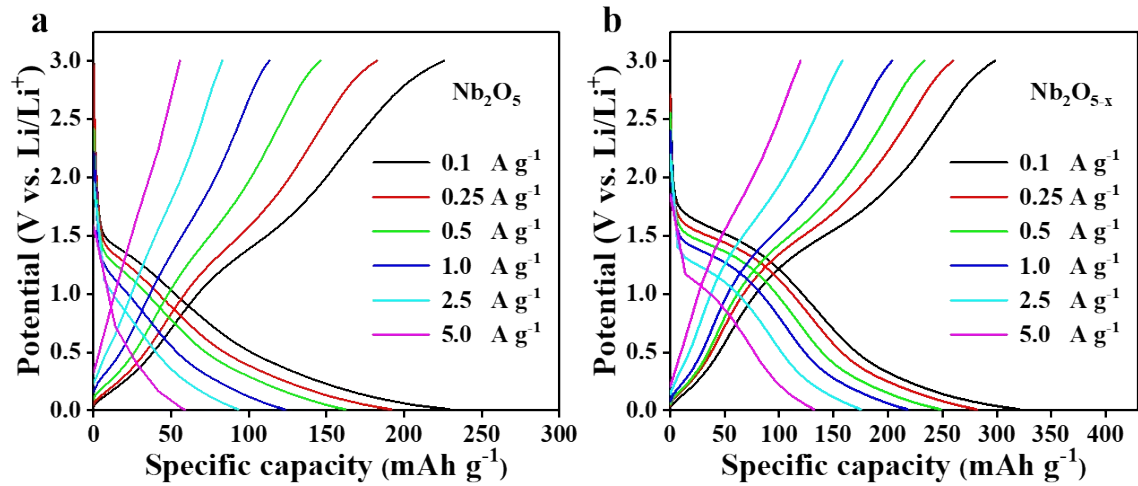

**Fig. S7** GCD curves of the (a) pristine  $\text{Nb}_2\text{O}_5$  and (b)  $\text{Nb}_2\text{O}_{5-x}$  at various current densities, respectively.

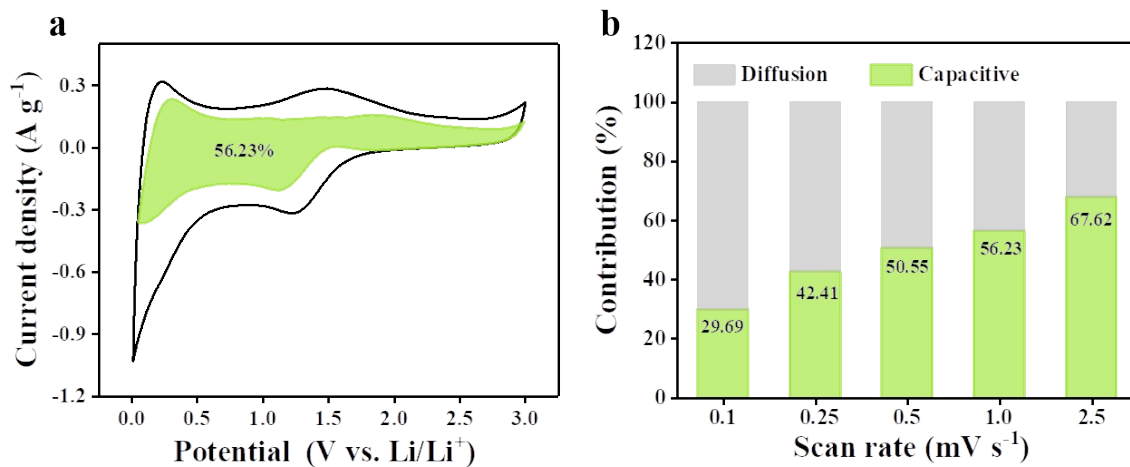

**Fig. S8** (a) CV response of the Nb<sub>2</sub>O<sub>5</sub> electrode with separation of the capacitive (green region) and diffusion current (blank region) at 1.0 mV s<sup>-1</sup>. (b) Capacitive contribution ratio of the Nb<sub>2</sub>O<sub>5</sub> electrode.

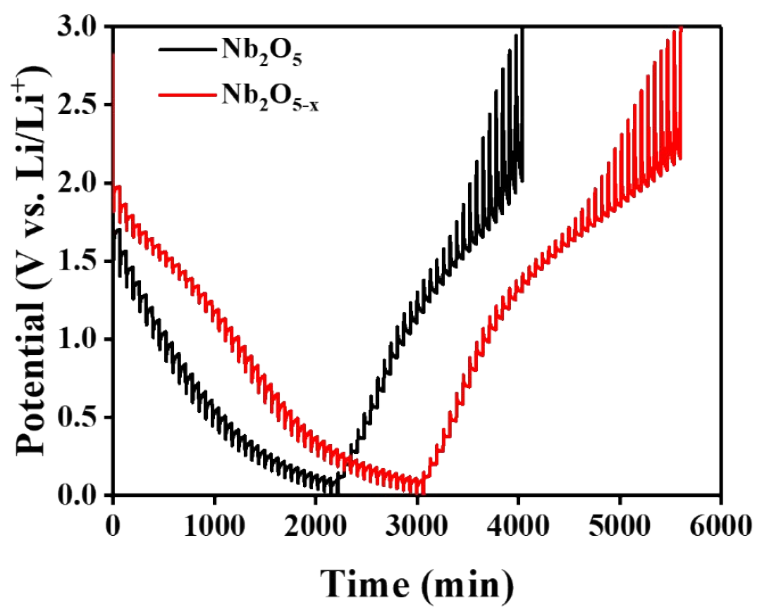

Fig. S9 GITT curves of the Nb<sub>2</sub>O<sub>5</sub> and Nb<sub>2</sub>O<sub>5-x</sub>.
